# Supplementary material
Source: Springer Nature journal article supplement (https://www.springermedizin.de/resource/supplementary/12885_2010_2571_MOESM5_ESM.pdf/9462586)

**A**

Time (hours)      unt      2      4      8      16

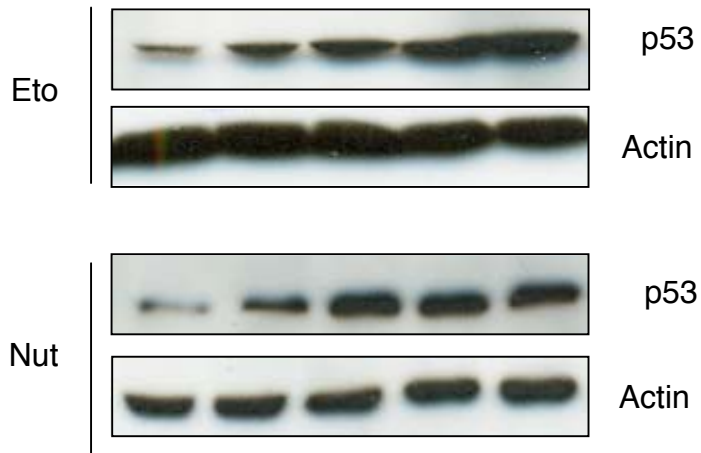**B**

Time (hours)      unt      4      8      16

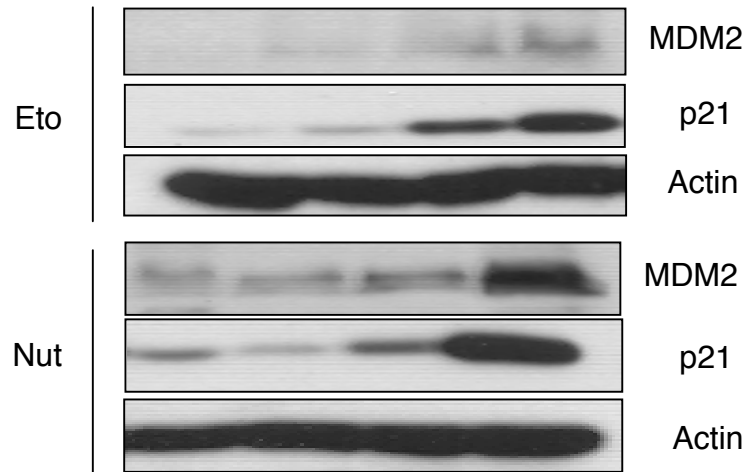

Supplement: MOESM5 [file 9462586]
